# Supplementary material for: Anxiety and Attentional Processes: The Role of Resting Heart Rate Variability
Source: MDPI journal article supplement (doi:10.3390/brainsci11040480), 2021-04-09

Supplementary material: Participant Flow-chart

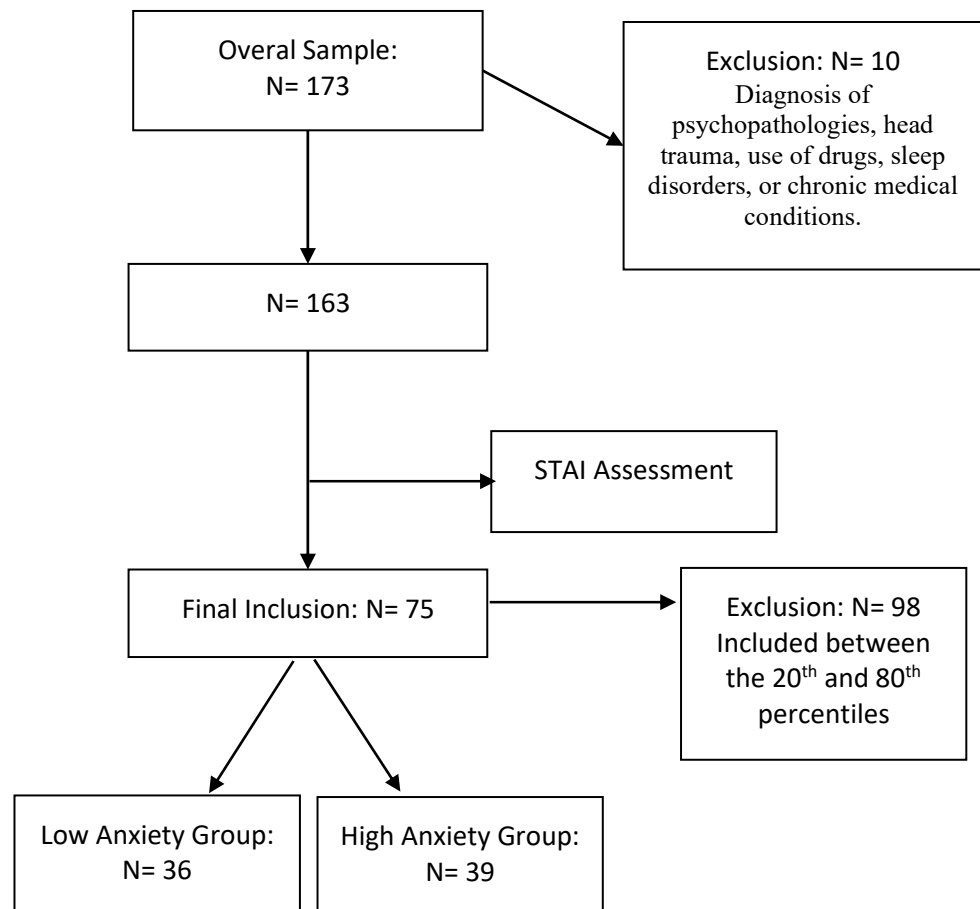

Supplement: s1 [file s1]
